# Supplementary material for: Turning Spent Coffee Grounds into Sustainable Precursors for the Fabrication of Carbon Dots
Source: MDPI journal article supplement (doi:10.3390/nano10061209), 2020-06-21
Supplement: s1 [file s1]

## SUPPORTING INFORMATION

# Turning Spent Coffee Grounds into Sustainable Precursors for the Fabrication of Carbon Dots

Diana M.A. Crista <sup>1</sup>, Abderrahim El Mragui <sup>2</sup>, Manuel Algarra <sup>2,\*</sup>, Joaquim C.G. Esteves da Silva <sup>1,3</sup>, Rafael Luque <sup>4,5,\*</sup> and Luís Pinto da Silva <sup>1,3,\*</sup>

<sup>1</sup> Chemistry Research Unit (CIQUP), Faculty of Sciences of University of Porto, R. Campo Alegre 697, 4169-007 Porto, Portugal; dianacrista4@gmail.com (D.M.A.C.); jcsilva@fc.up.pt (J.C.G.E.d.S.)

<sup>2</sup> Department of Inorganic Chemistry. Faculty of Science. University of Málaga. Campus de Teatino s/n 29071. Málaga, Spain; a.elmragui@edu.umi.ac.ma

<sup>3</sup> LACOMEPHI, GreenUPorto, Department of Geosciences, Environment and Territorial Planning, Faculty of Sciences of University of Porto, R. Campo Alegre 697, 4169-007 Porto, Portugal

<sup>4</sup> Departamento de Química Orgánica, Universidad de Córdoba, Edif. Marie Curie, Ctra N-IVA Km 396, E-14014 Córdoba, Spain

<sup>5</sup> Center for Molecular Design and Synthesis of Innovative compounds for Medicine, Peoples Friendship University of Russia (RUDN University), 6 Miklukho Maklaya Street, 117198 Moscow, Russia

\* Correspondence: manuel.gonzalez@staff.uma.pt (M.A.); q62alsor@uco.es (R.L.); luis.silva@fc.up.pt (L.P.d.S.)

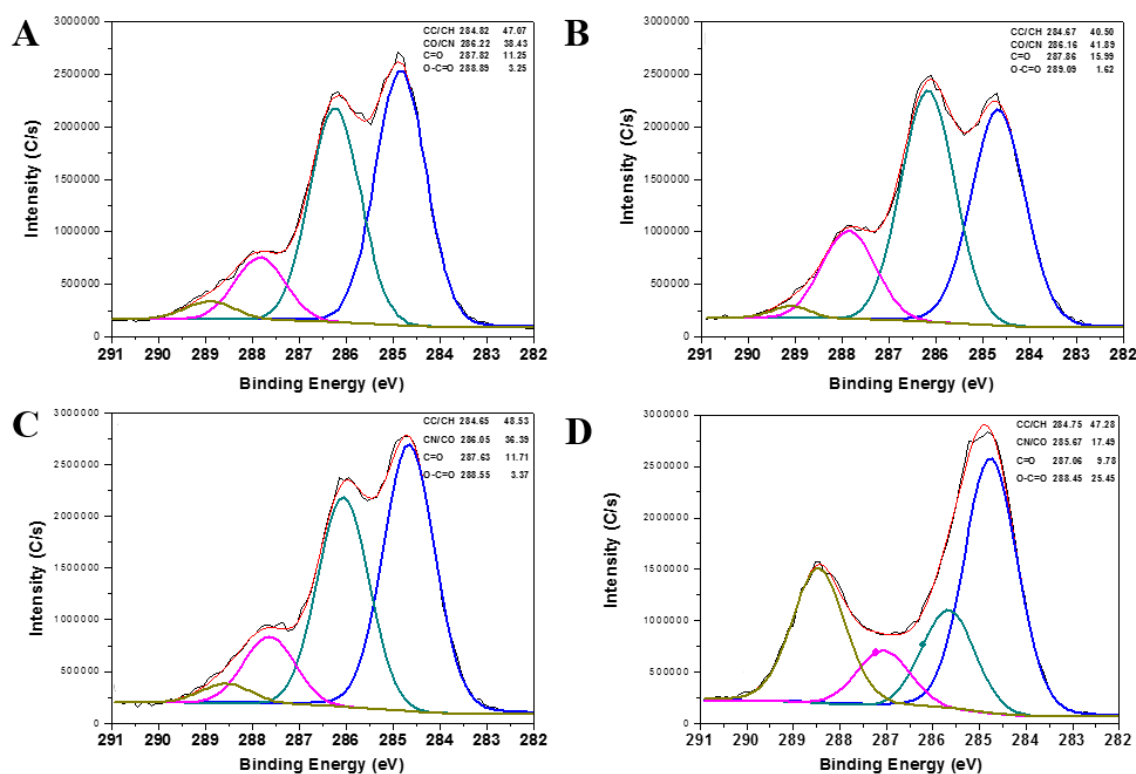

**Figure S1** – XPS C 1s spectra for decaf-CDs (A), rossio-CDs (B), prestige-CDs (c) and CA@U-CDs (D).

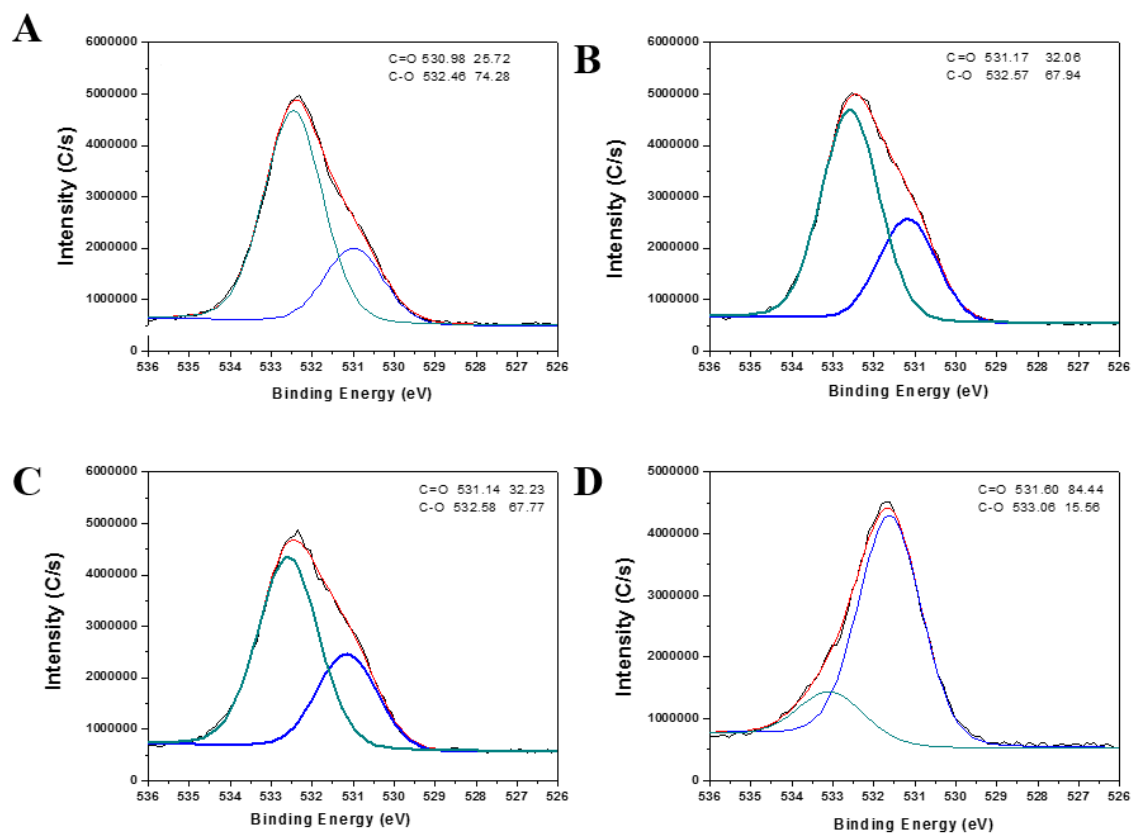

**Figure S2** – XPS O 1s spectra for decaf-CDs (A), rossio-CDs (B), prestige-CDs (c) and CA@U-CDs (D).

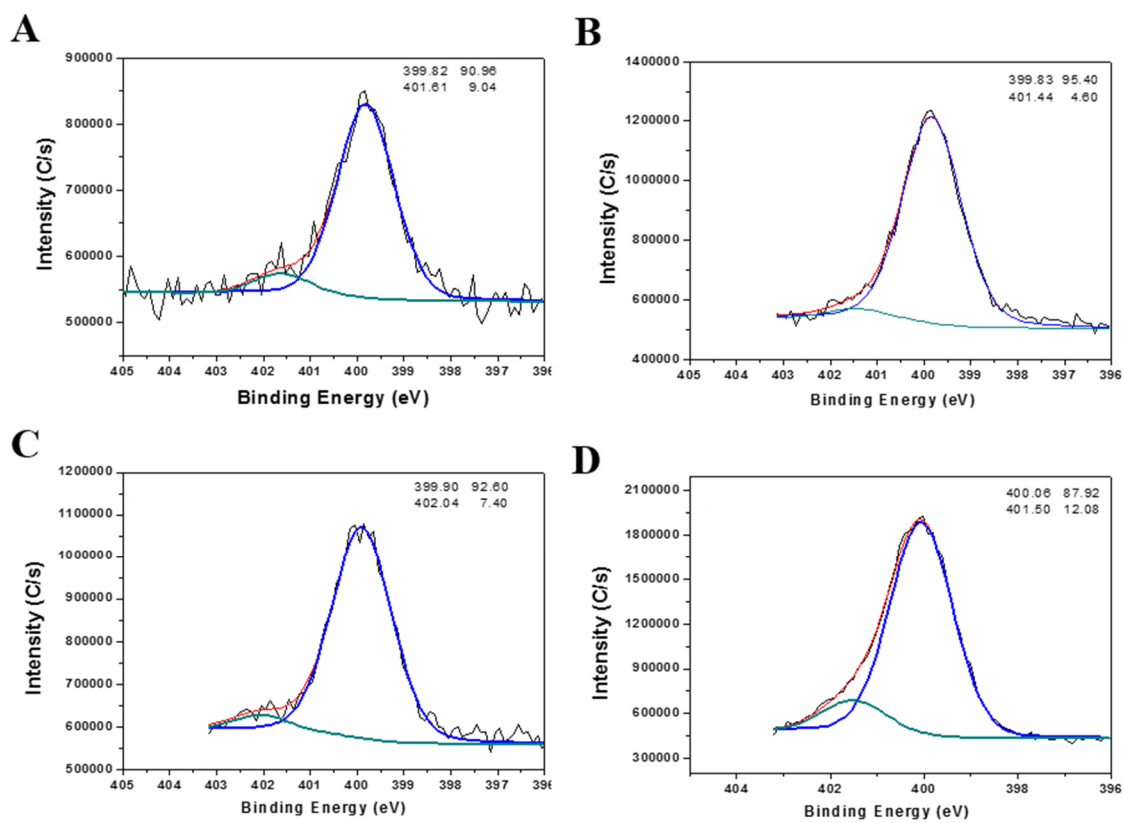

**Figure S3** – XPS N 1s spectra for decaf-CDs (A), rossio-CDs (B), prestige-CDs (C) and CA@U-CDs (D).

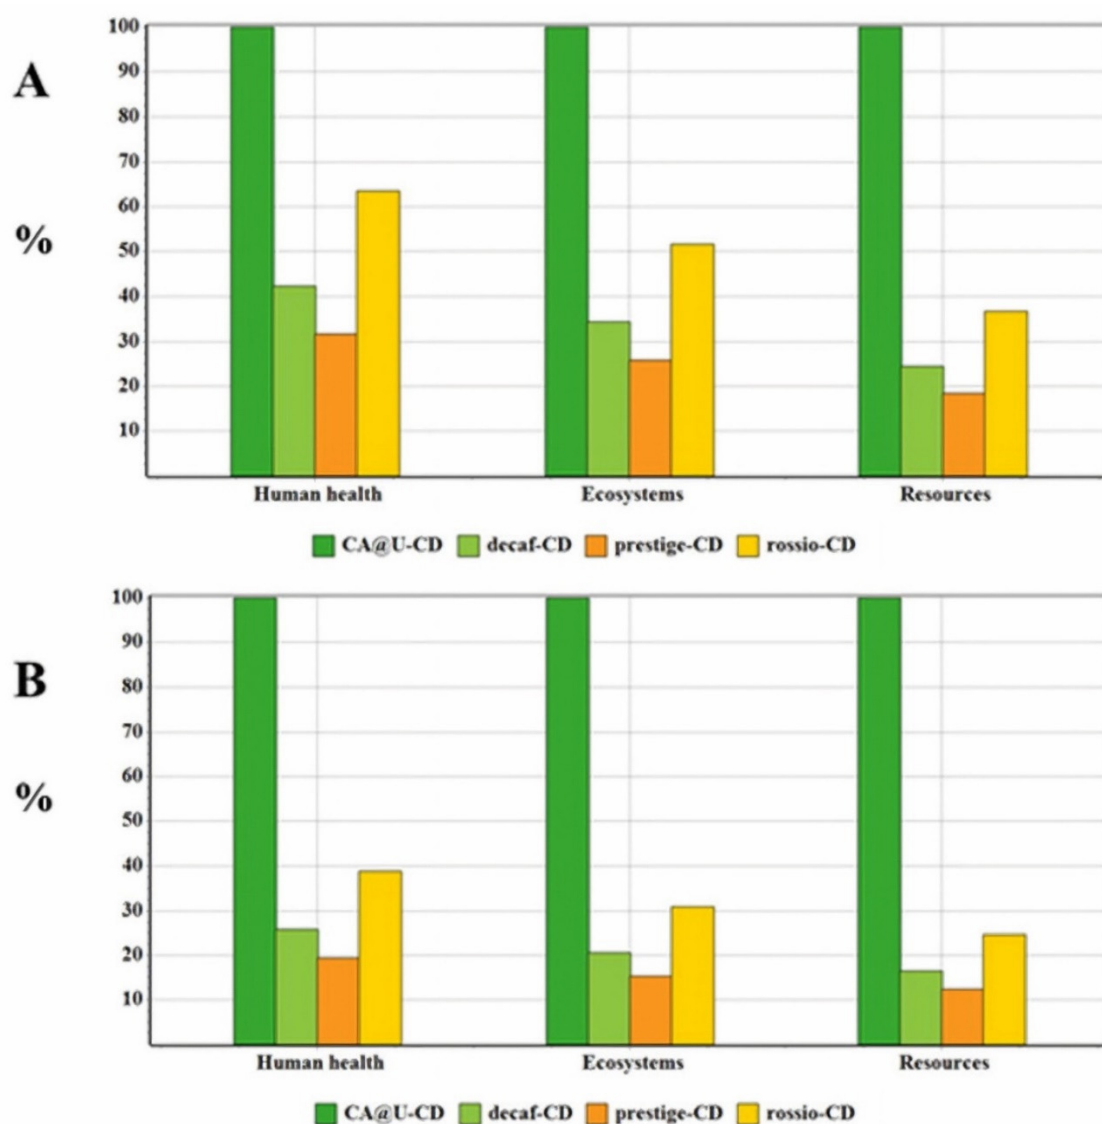

**Figure S4.** Comparative environmental profiles for the synthesis of all CDs, re-scaled with respect to the  $QY_{FL}$  of the CDs, by changing the input of citric acid to 70% (A) and to 130% (B) of the original value.

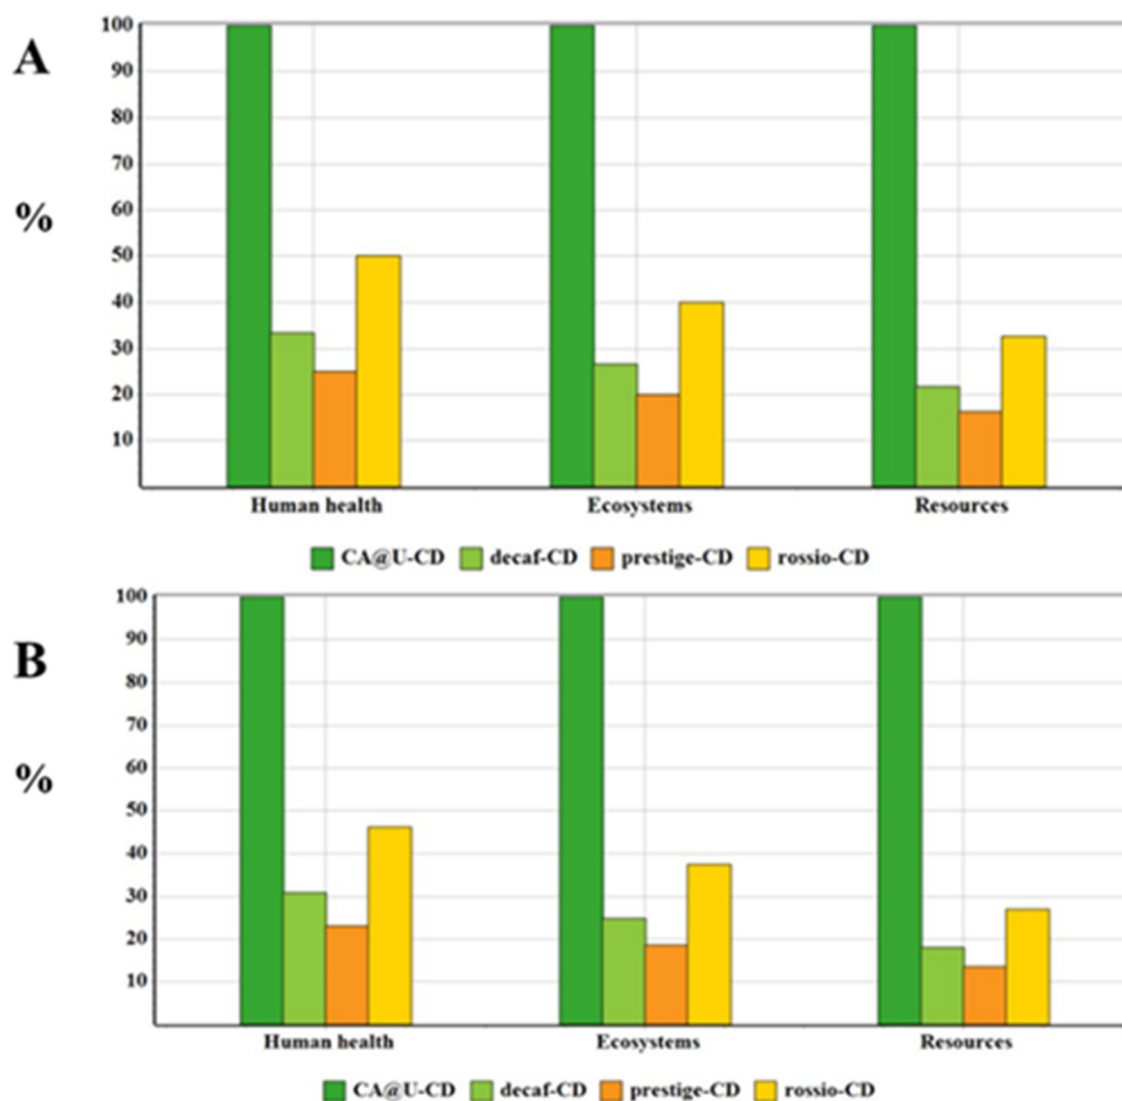

**Figure S5.** Comparative environmental profiles for the synthesis of all CDs, re-scaled with respect to the  $QY_{FL}$  of the CDs, by changing the input of urea to 70% (A) and to 130% (B) of the original value.

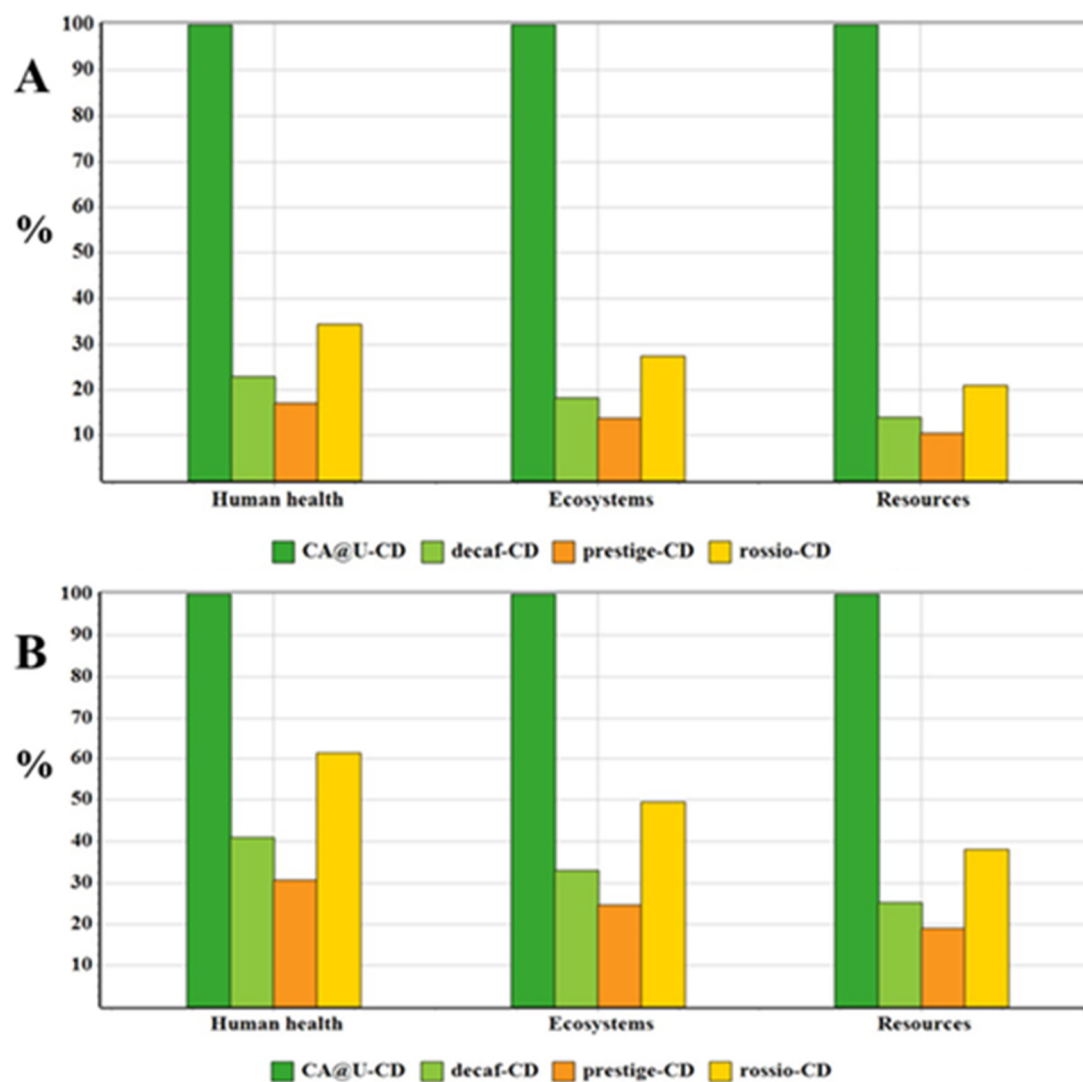

**Figure S6.** Comparative environmental profiles for the synthesis of all CDs, re-scaled with respect to the  $QY_{FL}$  of the CDs, by changing the input of electricity to 70% (A) and to 130% (B) of the original value.
